1 **Full Title:**

2 How many days are needed to estimate accelerometry-assessed physical activity during  
3 pregnancy? Methodological analyses based on a cohort study using wrist-worn accelerometer

4  
5 **Short title:**

6  
7 Number of days required to estimate physical activity during pregnancy

8  
9 Shana Ginar da Silva, Ph.D<sup>1,2</sup>

10 [sginar@gmail.com](mailto:sginar@gmail.com)

11 Kelly R Evenson, Ph.D<sup>2</sup>

12 [kelly\\_evenson@unc.edu](mailto:kelly_evenson@unc.edu)

13 Ulf Ekelund, Ph.D<sup>3</sup>

14 [ulf.ekelund@nih.no](mailto:ulf.ekelund@nih.no)

15 Inácio Crochemore Mohsam da Silva, Ph.D<sup>1</sup>

16 [inacio\\_cms@yahoo.com.br](mailto:inacio_cms@yahoo.com.br)

17 Marlos Rodrigues Domingues, Ph.D<sup>4</sup>

18 [marlosufpel@gmail.com](mailto:marlosufpel@gmail.com)

19 Bruna Gonçalves Cordeiro da Silva, Ph.D<sup>1</sup>

20 [brugcs@hotmail.com](mailto:brugcs@hotmail.com)

21 Márcio de Almeida Mendes, Ph.D<sup>1</sup>

22 [marciopenha.esef@yahoo.com.br](mailto:marciopenha.esef@yahoo.com.br)

23 Glória Isabel Niño Cruz, Ph.D<sup>1</sup>

24 [ginc\\_s@hotmail.com](mailto:ginc_s@hotmail.com)

25 Pedro Curi Hallal, Ph.D<sup>1</sup>

26 [prchallal@gmail.com](mailto:prchallal@gmail.com)

27  
28  
29 <sup>1</sup> PostGraduate Program in Epidemiology, Federal University of Pelotas, Brazil.

30 <sup>2</sup> University of North Carolina – Chapel Hill, Gillings School of Global Public Health,  
31 Department of Epidemiology, Chapel Hill, North Carolina, United States.

32 <sup>3</sup> Department of Sports Medicine, Norwegian School of Sport Sciences, Oslo, Norway.

33 <sup>4</sup>Postgraduate Program in Physical Education, Federal University of Pelotas, Brazil.

34  
35  
36  
37 **Corresponding author:**

38 Shana Ginar da Silva ([sginar@gmail.com](mailto:sginar@gmail.com))

39 Rua Marechal Deodoro, 1160 - 3º piso.

40 CEP: 96020-220

41 Bairro Centro, Pelotas, Rio Grande do Sul, Brazil.

42 Phone: +55 5332841300

## 43 Abstract

44

45 **Background:** Objective methods to measure physical activity (PA) can lead to better cross-  
46 cultural comparisons, monitoring temporal PA trends, and measuring the effect of  
47 interventions. However, when applying this technology in field-work, the accelerometer data  
48 processing is prone to methodological issues. One of the most challenging issues relates to  
49 standardizing total wear time to provide reliable data across participants. It is generally  
50 accepted that at least 4 complete days of accelerometer wear represent a week for adults. It is  
51 not known if this same assumption holds true for pregnant women. **Aim:** We assessed the  
52 optimal number of days needed to obtain reliable estimates of overall PA and moderate-to-  
53 vigorous physical activity (MVPA) during pregnancy using a raw triaxial wrist-worn  
54 accelerometer. **Methods:** Cross-sectional analyses were carried out in the antenatal wave of  
55 the 2015 Pelotas (Brazil) Birth Cohort Study. Participants wore the wrist ActiGraph wGT3X-  
56 BT accelerometer for seven consecutive days. The daily average acceleration, which  
57 indicates overall PA, was measured as milli-g (mg), and time spent in MVPA (minutes/day)  
58 was analyzed in 5-minute bouts. ANOVA and Kruskal-Wallis tests were used to compare  
59 variability across days of the week. Bland-Altman plots and Spearman-Brown Prophecy  
60 Formula were applied to determine the reliability coefficient associated with one to seven  
61 days of measurement. Analyses were stratified by sociodemographic factors and nutritional  
62 status. **Results:** Among 2,082 pregnant women who wore the accelerometer for seven  
63 complete days, overall and MVPA were lower on Sundays compared to other days of the  
64 week. Reliability of  $\geq 0.80$  to evaluate overall PA was reached with at least three monitoring  
65 days, whereas six days were needed to estimate reliable measures of MVPA. **Conclusions:**  
66 Our findings indicate that the usual approach obtaining one week of accelerometry in adults  
67 is also appropriate for pregnant women, particularly to obtain differences on weekend days  
68 and reliably estimate MVPA.

69

## 70 Introduction

71 Objective methods to measure physical activity (PA), such as accelerometers, have  
72 become widely used over the years given the high degree of validity to assess patterns of PA  
73 in free-living conditions [1]. Accelerometry-based PA assessment can lead to better cross-  
74 cultural comparisons, monitoring temporal PA trends and measuring the effect of

75 interventions [2]. However, when applying this technology in field-work, the accelerometer  
76 data processing is prone to methodological issues with important implications that can affect  
77 data quality [3,4]. One of the most challenging issues relates to standardizing total wear time  
78 to provide reliable data across participants [5-8].

79 Several studies have been carried out in children [9], young [10,11] and adult  
80 population [12,13] focused on the numbers of monitoring days necessary to represent habitual  
81 PA behavior. Results of these studies suggested a large variability in the number of days  
82 required to obtain reliable measures of PA ranging from 2 to 9 days. Also, the number of  
83 required days varies according to the intensity of physical activities, often grouped as  
84 sedentary behavior, and light, moderate, and vigorous intensity [12,13]. Other factors that  
85 can influence the monitoring time-frame are the type of accelerometer used and placement of  
86 the device (e.g., wrist, thigh, or waist) [6-8].

87 More recently, a growing interest in PA during pregnancy has emerged given the  
88 potential positive effects of PA on maternal-child health [14]. However, there are currently  
89 few studies which have used accelerometers to measure PA during pregnancy [15,16].  
90 Moreover, research focus to determine a suitable monitoring time-frame to accurately  
91 measure PA behavior has been performed in young to middle-aged adults [10-13], and no  
92 data appear available among pregnant women. Therefore, the purpose of this study was to  
93 examine the optimal number of days needed to obtain reliable estimates of overall PA and  
94 MVPA during pregnancy using a raw triaxial wrist-worn accelerometer in a population-based  
95 study in southern Brazil. In addition, we aimed at measuring the variability in the means of  
96 PA across days of the week.

## 97 **Materials and Methods**

### 98 **Design and participants**

99 We conducted cross-sectional analyses based on the antenatal wave of the 2015  
100 Pelotas (Brazil) Birth Cohort Study. Participants with an expected delivery date from

101 January 1<sup>st</sup> 2015 to 31<sup>st</sup> December 2015 were eligible for the cohort and recruited from all  
102 health facilities offering antenatal care (public and private) in the city of Pelotas.  
103 Accelerometry data was collected between weeks 16 and 24 of gestation. Details regarding  
104 this study have been previously described elsewhere [17]. Ethical approval for this study was  
105 obtained from the Ethics Committee of the Physical Education School - Federal University of  
106 Pelotas, in accordance with official letter numbered 522/064, approved the study. All  
107 participants signed a written informed consent prior to participation.

## 108 **Measurements**

109 The accelerometer used was the ActiGraph wGT3X-BT models  
110 (ActiGraph, Pensacola, FL, USA). These devices were lightweight (27 g) and compact ( $3.8 \times$   
111  $3.7 \times 1.8$  cm), allowing measurement of body movements over three orthogonal axes vertical  
112 (Y), horizontal right-left (X), and horizontal front-back axis (Z), within an acceleration  
113 dynamic range of  $\pm 8g$  [18]. Participants wore the accelerometer on their non-dominant wrist  
114 (dorsally midway between the radial and ulnar styloid processes) during 24 hours for seven  
115 consecutive days. The accelerometer was programmed to collect raw acceleration at 60 Hz  
116 and three-dimensional raw data was expressed in gravitational equivalent units called milli-  
117 gravity (mg, where  $1000mg = 1g = 9.81 \text{ m/s}^2$ ).

## 118 **Data reduction**

119 Devices were programmed and accelerometers' data downloaded using ActiLife  
120 software, version 6.11.7. Accelerometer raw data analyses were performed in R-package  
121 GGIR [19]. The following parameters were used to consider valid data for the analyses:  
122 calibration error  $< 0.02g$  and seven full days of measurement (total protocol). Euclidian Norm  
123 Minus One (ENMO) was used to summarize three-dimensional raw data (from axes x, y, and  
124 z) into a single-dimensional signal vector magnitude ( $SVM = \sum |\sqrt{x^2 + y^2 + z^2} - 1g|$ ) [19].  
125 Data were further summarized when calculating the average values per 5-second epochs. The

126 summary measures used were (a) overall PA (expressed in mg), based on the average SVM  
127 per day, (b) average time spent in MVPA per day with 5-minute bouts criterion (expressed in  
128 minutes). MVPA was defined as SVM records above 100mg [20,21], while bouts criterion  
129 was defined as consecutive periods in which participants spent at least 80% of time in  
130 activities with intensity equal or higher the MVPA threshold.

### 131 **Statistical analysis**

132 Sample descriptions are presented in relative (%) and absolute frequencies (N).  
133 Overall PA was expressed in mean and standard deviation (SD), while MVPA was presented  
134 as a mean, SD, median, and interquartile range (25th and 75th percentiles). ANOVA and  
135 Kruskal-Wallis non-parametric test were used to compare whether PA varied significantly  
136 across days of the week. If an overall significant F level was shown, post-hoc tests  
137 (Bonferroni pairwise comparisons) were used to assess differences between weekdays  
138 (Monday to Sunday). The number of days required to reliably estimate habitual PA (overall  
139 PA and MVPA) was assessed using the Spearman-Brown formula. A modified version of the  
140 Spearman-Brown calculation determined the intraclass reliability coefficient associated with  
141 1 to 7 days of measurement. The standard typically used for acceptable reliability is an ICC  
142 of  $\geq 0.80$  [22]. We also assessed agreement based on the visual inspection of the Bland-  
143 Altman plots.

144 We stratified the analysis by maternal age (<20, 20-29, 30-39,  $\geq 40$ ), skin color (white,  
145 black, brown/yellow/indigenous), socioeconomic position (based on asset index [23] and later  
146 categorized into quintiles) paid job during pregnancy (yes/no), and pre-pregnancy body mass  
147 index (BMI) (calculated by dividing weight by height squared ( $\text{kg/m}^2$ ) with cutoffs were  
148 defined according to the World Health Organization [24]. All analyses were performed using  
149 Stata version 12.1 (StataCorp, College Station, TX, USA). Statistical significance was set at  $\alpha$   
150  $< 0.05$ .

151 **Results**

152 From 2,463 pregnant women with accelerometry data, 2,082 adhered to the research  
 153 protocol and wore accelerometer for seven consecutive days. A high proportion of the sample  
 154 was aged 20-29 (49.5%), white skin color (73.3%), did not have a paid job during pregnancy  
 155 (50.1%), with normal pre-pregnancy BMI (48.8%) and belonged to the top quintile for socio-  
 156 economic position (Table 1).

157 **Table 1.** Characteristics of participants that wore accelerometer for seven  
 158 consecutive days. The 2015 Pelotas (Brazil) birth cohort study.

|                                             | <b>n</b> | <b>%</b> |
|---------------------------------------------|----------|----------|
| <b>Maternal age (years)</b>                 |          |          |
| <20                                         | 277      | 13.3     |
| 20-29                                       | 1,029    | 49.5     |
| 30-39                                       | 722      | 34.7     |
| ≥ 40                                        | 52       | 2.5      |
| <b>Skin color</b>                           |          |          |
| White                                       | 1,523    | 73.3     |
| Black                                       | 255      | 12.3     |
| Brown/yellow/indigenous                     | 299      | 14.4     |
| <b>SES (quintiles)</b>                      |          |          |
| Q1 (poorest)                                | 243      | 14.7     |
| Q2                                          | 327      | 19.8     |
| Q3                                          | 358      | 21.7     |
| Q4                                          | 359      | 21.7     |
| Q5 (wealthiest)                             | 366      | 22.1     |
| <b>Paid job during pregnancy</b>            |          |          |
| No                                          | 1,042    | 50.1     |
| Yes                                         | 1,037    | 49.9     |
| <b>Pre-pregnancy BMI (Kg/m<sup>2</sup>)</b> |          |          |
| Underweight                                 | 61       | 3.3      |
| Normal                                      | 913      | 48.8     |
| Overweight                                  | 536      | 28.7     |
| Obese                                       | 360      | 19.3     |

SES: socioeconomic position; BMI: body mass index.

171

172

173 Mean overall PA (mg) and time spent in MVPA (minutes/day) was different across  
 174 days of the week. Overall PA and time spent in MVPA was lower on Sunday (25.6 mg and  
 175 8.6 minutes/day, respectively) compared to all other days. Pregnant women were more  
 176 physically active on weekdays (p<0.001) for both overall PA and MVPA (Table 2).

**Table 2.** Daily duration (*mg* and minutes) of overall physical activity and moderate to vigorous physical activity

|           | Overall PA ( <i>mg</i> ) |     |                       | MVPA (minutes/day) |      |                       |        |                     |                       |
|-----------|--------------------------|-----|-----------------------|--------------------|------|-----------------------|--------|---------------------|-----------------------|
|           | Mean                     | SD  | <i>p</i> <sup>a</sup> | Mean               | SD   | <i>p</i> <sup>b</sup> | Median | Interquartile range | <i>p</i> <sup>b</sup> |
|           |                          |     | <0.001                |                    |      | <0.001                |        |                     | <0.001                |
| Monday    | 28,0                     | 8,9 |                       | 15,5               | 21,5 |                       | 7,5    | 0 – 22              |                       |
| Tuesday   | 28,2                     | 8,8 |                       | 15,2               | 20,9 |                       | 6,9    | 0 – 22              |                       |
| Wednesday | 28,2                     | 9,2 |                       | 15,2               | 21,0 |                       | 7,3    | 0 – 21              |                       |
| Thursday  | 28,4                     | 8,7 |                       | 16,5               | 22,5 |                       | 8,8    | 0 – 24              |                       |
| Friday    | 28,6                     | 9,0 |                       | 16,0               | 21,8 |                       | 8,3    | 0 - 23              |                       |
| Saturday  | 28,3                     | 8,7 |                       | 12,5 <sup>‡</sup>  | 19,0 |                       | 5,2    | 0 - 17              |                       |
| Sunday    | 25,4 <sup>‡</sup>        | 7,9 |                       | 8,6 <sup>‡</sup>   | 15,5 |                       | 0      | 0 - 11              |                       |

<sup>a</sup>ANOVA <sup>b</sup>Kruskal-Wallis' test <sup>‡</sup>Bonferroni's test

MVPA: moderate-to-vigorous physical activity. PA: physical activity. SD: standard deviation

177

178 Estimates of the number of days needed to obtain reliable measures of habitual PA are  
179 presented in Figure 1.

180

181 **Figure 1.** Reliability coefficient for number of days monitoring.

182

183 For overall PA, at least three days of the week was the minimum necessary to achieve  
184 a reliability of 0.80 whereas six monitoring days were needed to estimate reliable measures of  
185 MVPA. These results indicate that between 43–57%, 60–83%, 69–80%, 75–84%, 79-87%,  
186 82-89% and 84-90% of the variance was accounted for using 1 to 7 days monitoring to  
187 represent habitual activity for overall PA and MVPA, respectively.

188 Table 3 presented the reliability coefficient associated with different number of  
189 monitored days stratified by age, nutritional status and sociodemographic groups. In terms of  
190 overall PA, a minimum of three days of monitoring show IRC (Intra-class reliability  
191 coefficient) values close to 0.80 for all groups of age, skin color, socioeconomic position, job  
192 characteristics and pre-pregnancy BMI. Reaching IRC values of around 0.80 requires a  
193 minimum of six days of use for MVPA, except for pregnant women younger than 20 years,

194 who tend to have a more variable PA pattern and reach an IRC of 0.80 when monitored for at  
195 least seven days.  
196  
197  
198  
199  
200  
201  
202  
203  
204  
205  
206  
207  
208  
209  
210  
211  
212  
213  
214  
215



**Table 3.** Intraclass reliability correlation coefficient stratified by maternal age, SES and paid job during pregnancy in pregnant women belonging to the 2015 Pelotas (Brazil) Birth Cohort Study.

|                                             | Intraclass reliability coefficient by Spearman-Brown Prophecy Formula |        |        |        |        |        |        |       |        |        |        |        |        |        |
|---------------------------------------------|-----------------------------------------------------------------------|--------|--------|--------|--------|--------|--------|-------|--------|--------|--------|--------|--------|--------|
|                                             | Overall PA                                                            |        |        |        |        |        |        | MVPA  |        |        |        |        |        |        |
|                                             | 1 day                                                                 | 2 days | 3 days | 4 days | 5 days | 6 days | 7 days | 1 day | 2 days | 3 days | 4 days | 5 days | 6 days | 7 days |
| <b>Maternal age (years)</b>                 |                                                                       |        |        |        |        |        |        |       |        |        |        |        |        |        |
| <20                                         | 0.52                                                                  | 0.69   | 0.77   | 0.81   | 0.85   | 0.87   | 0.88   | 0.29  | 0.45   | 0.55   | 0.62   | 0.67   | 0.71   | 0.74   |
| 20-29                                       | 0.57                                                                  | 0.72   | 0.80   | 0.84   | 0.87   | 0.89   | 0.90   | 0.45  | 0.62   | 0.71   | 0.76   | 0.80   | 0.83   | 0.85   |
| 30-39                                       | 0.61                                                                  | 0.76   | 0.82   | 0.86   | 0.89   | 0.90   | 0.92   | 0.45  | 0.62   | 0.71   | 0.77   | 0.80   | 0.83   | 0.85   |
| ≥ 40                                        | 0.44                                                                  | 0.61   | 0.70   | 0.76   | 0.80   | 0.82   | 0.85   | 0.41  | 0.59   | 0.68   | 0.74   | 0.78   | 0.81   | 0.83   |
| <b>Skin color</b>                           |                                                                       |        |        |        |        |        |        |       |        |        |        |        |        |        |
| White                                       | 0.58                                                                  | 0.73   | 0.80   | 0.85   | 0.87   | 0.89   | 0.91   | 0.43  | 0.61   | 0.70   | 0.75   | 0.79   | 0.82   | 0.84   |
| Black                                       | 0.57                                                                  | 0.73   | 0.80   | 0.84   | 0.87   | 0.89   | 0.90   | 0.43  | 0.60   | 0.69   | 0.75   | 0.79   | 0.82   | 0.84   |
| Brown/Yellow/Indigenous                     | 0.55                                                                  | 0.71   | 0.78   | 0.83   | 0.86   | 0.88   | 0.89   | 0.37  | 0.54   | 0.64   | 0.70   | 0.75   | 0.78   | 0.81   |
| <b>SES (quintiles)</b>                      |                                                                       |        |        |        |        |        |        |       |        |        |        |        |        |        |
| Q1(poorest)                                 | 0.59                                                                  | 0.74   | 0.81   | 0.85   | 0.88   | 0.90   | 0.91   | 0.45  | 0.62   | 0.71   | 0.76   | 0.80   | 0.83   | 0.85   |
| Q2                                          | 0.53                                                                  | 0.69   | 0.77   | 0.82   | 0.85   | 0.87   | 0.89   | 0.39  | 0.56   | 0.66   | 0.72   | 0.76   | 0.79   | 0.82   |
| Q3                                          | 0.60                                                                  | 0.75   | 0.82   | 0.86   | 0.88   | 0.90   | 0.91   | 0.39  | 0.56   | 0.65   | 0.72   | 0.76   | 0.79   | 0.82   |
| Q4                                          | 0.55                                                                  | 0.71   | 0.79   | 0.83   | 0.86   | 0.88   | 0.89   | 0.36  | 0.53   | 0.63   | 0.69   | 0.74   | 0.77   | 0.80   |
| Q5 (wealthiest)                             | 0.56                                                                  | 0.72   | 0.80   | 0.84   | 0.87   | 0.89   | 0.90   | 0.41  | 0.58   | 0.68   | 0.74   | 0.78   | 0.81   | 0.83   |
| <b>Paid job during pregnancy</b>            |                                                                       |        |        |        |        |        |        |       |        |        |        |        |        |        |
| No                                          | 0.58                                                                  | 0.73   | 0.80   | 0.84   | 0.87   | 0.89   | 0.90   | 0.39  | 0.56   | 0.65   | 0.72   | 0.76   | 0.79   | 0.82   |
| Yes                                         | 0.57                                                                  | 0.72   | 0.80   | 0.84   | 0.87   | 0.89   | 0.90   | 0.48  | 0.65   | 0.73   | 0.78   | 0.82   | 0.85   | 0.86   |
| <b>Pre-pregnancy BMI (Kg/m<sup>2</sup>)</b> |                                                                       |        |        |        |        |        |        |       |        |        |        |        |        |        |
| Underweight                                 | 0.57                                                                  | 0.73   | 0.80   | 0.84   | 0.87   | 0.89   | 0.90   | 0.42  | 0.59   | 0.69   | 0.74   | 0.78   | 0.81   | 0.84   |
| Normal                                      | 0.58                                                                  | 0.73   | 0.80   | 0.85   | 0.87   | 0.89   | 0.91   | 0.45  | 0.63   | 0.71   | 0.77   | 0.81   | 0.83   | 0.85   |
| Overweight                                  | 0.58                                                                  | 0.71   | 0.81   | 0.85   | 0.88   | 0.89   | 0.91   | 0.42  | 0.59   | 0.69   | 0.75   | 0.79   | 0.81   | 0.84   |
| Obese                                       | 0.55                                                                  | 0.71   | 0.78   | 0.83   | 0.86   | 0.88   | 0.89   | 0.42  | 0.59   | 0.69   | 0.74   | 0.78   | 0.81   | 0.84   |

SES: socioeconomic position; MVPA: moderate-to-vigorous physical activity; PA: physical activity; BMI: body mass index.

216

217

218

219 Bland-Altman plots indicated on average differences between number of days near  
220 zero, narrow limits of agreement and a homogeneous variability across the days of  
221 monitoring, for both overall PA and MVPA. Thus, more days of monitoring produce lower  
222 variability between measurement days (1 to 6) and the standard seven-day protocol for both  
223 MVPA and overall PA (Figure 2 and 3).

224

225 **Figure 2.** Bland-Altman plots of the comparison between the means of measurement days (1 to  
226 6) and the standard of seven complete days of measurement for moderate-to-vigorous physical activity  
227 (MVPA).

228

229 **Figure 3.** Bland-Altman plots of the comparison between the means of measurement days (1 to 6)  
230 and the standard of seven complete days of measurement for overall physical activity.

231

232 As expected, higher mean differences were found between one day and seven  
233 complete days for both MVPA (mean difference: 0.36; 95%CI: -0.31-1.02) and overall PA  
234 (mean difference: 0.09; 95%CI: -0.15; 0.33). On the other hand, lower mean differences were  
235 identified between six days of measurement and the standard protocol in the two intensities  
236 investigated, MVPA (mean difference: -0.11; 95%CI: -0.21; -0.01) and overall PA (mean  
237 difference: -0.03; 95%CI: -0.06; 0.01), respectively.

238

## 239 **Discussion**

240 This study determined the number of monitoring days needed to obtain reliable  
241 estimates of overall PA and MVPA in pregnant women using wrist-worn accelerometers in a  
242 population-based study in southern Brazil. Our findings showed that at least six monitoring  
243 days of the week should be considered to achieve a reliability of 0.80 to accurately predict  
244 both overall PA and MVPA levels. Variability in the means of overall PA and MVPA across

245 the days of the week was also observed and clear differences were noted, with the lowest  
246 means of overall PA and MVPA on Sunday. This finding indicates that weekend days cannot  
247 be ignored in the design and analysis of PA studies. Considered together, these findings  
248 support the usual approach of asking adults to wear an accelerometer for one week.

249 To the best of our knowledge, this is the first study to date to investigate the number  
250 of days needed to obtain reliable estimates of overall PA and MVPA during pregnancy in a  
251 representative population sample using raw triaxial wrist accelerometry. Thus, our  
252 observations are not directly comparable with previous observations. However, it seems well  
253 established in the literature that the number of days needed to obtain reliable estimates of  
254 habitual activity varies according to the intensity of physical activities measured. A study  
255 conducted by Dillon and cols [12], using wrist-worn GENEActiv accelerometers investigated  
256 an acceptable reliability measure of weekly habitual PA in middle-aged Irish adults. They  
257 also found that the monitoring frame duration for reliable estimates varied across intensity  
258 categories. Results ranged from 2 days when evaluating combined MVPA to 6 days for  
259 specifically vigorous activities. Matthews et al. [25] using the Computer Science  
260 Applications (CSA) accelerometer on the hip in healthy adults determined that 3–4 days  
261 monitoring were required to accurately measure MVPA. Similar results were reported by  
262 Hart et al. [13] in a study with older adults using waist-worn accelerometers. Contrary to  
263 these findings, we observed that six monitoring days are necessary to produce reliable  
264 measures of MVPA among pregnant women. Pregnancy is a complex period that involves  
265 many physical and psychological changes including morphological adjustments for an ideal  
266 environment for fetal development, changes in mood, anxiety, fatigue/energy, etc [26]. These  
267 factors may contribute to a larger variability in MVPA measurements throughout the week in  
268 pregnant women compared to other populations.

269 Previously published data have indicated a wide variability in the number of days  
270 needed to estimate a reliable measure of PA in different population groups. Several aspects

271 may explain the inconsistency between prior results such as the heterogeneity in the type of  
272 accelerometer adopted, number of accelerometers used in the studies (single or multiple body  
273 position), available budget for data collection and placement of the device (hip/waist or  
274 wrist). Another question that may influence the differences is the statistical techniques  
275 applied to obtain stable mean estimates of PA. These discrepancies in the methods of each  
276 study emphasize the need to establish an appropriate monitoring frame to reliably capture  
277 habitual physical behavior for each population, accelerometer, PA intensity and body position  
278 of wearing the devices [27].

279         Patterns of PA during pregnancy are influenced by demographic, economic,  
280 environmental and behavioral characteristics [15, 27]. Considering the possible influence of  
281 these aspects on the number of days required to represent weekly habitual PA, analyses were  
282 stratified by sociodemographic factors and nutritional status. Similar results were found for  
283 all groups except for pregnant women younger than 20 years, who needed more than 7 days  
284 of monitoring to achieve reliable measures of MVPA.

285         The valid and reliable activity monitor, 24-hour study protocol, large sample size,  
286 high-rate response, wrist-worn accelerometer and statistical techniques employed are  
287 strengths of our study. The Spearman-Brown prophecy formula has been used in most  
288 studies investigating appropriate monitoring frames [12]. However, some limitations should  
289 be noted. In our study, accelerometers were used for seven complete and consecutive days.  
290 Monitoring for longer periods, such as a month, season or a year, would be alternatives to  
291 obtain greater representativeness of habitual PA behavior given that many studies have  
292 reported seasonal and monthly variations in PA [29, 30]. However, a longer collection time  
293 would probably result in lower compliance and bring logistic issues during collection (such  
294 as battery replacement and data downloading). Also, our results showed that measuring six  
295 consecutive days we could reliably estimate overall PA and MVPA in this group of pregnant  
296 women.

297           In addition, our findings are not advocating for future studies among pregnant using  
298 only three (to estimate overall PA) or six monitoring days (to estimate MVPA). Our results  
299 suggest that a seven day protocol may be optimal when assessing habitual PA in pregnant  
300 women. If a short time of assessment is applied, there will be no room for non-wear time,  
301 which might lead for a limited number of valid data. Furthermore, it is important to note that  
302 our analyses presented the minimum necessary for a reliable estimate of habitual PA  
303 objectively measured, which might be specific for our research context. These set of analyses  
304 are highly recommended for each single study in order to robustly define their inclusion  
305 criteria in terms of minimum of valid days.

306

### 307 **Conclusion**

308           Our results indicate that at least three days of monitoring are required to reliably  
309 capture overall PA and six days monitoring when considering MVPA. Due to the  
310 substantially lower PA levels during Sundays, we recommend a seven day protocol  
311 throughout a full week when assessing habitual PA in pregnant women. These findings may  
312 have implications for future study designs and data reduction strategies among  
313 accelerometer-assessed physical activity studies of pregnant women.

314

### 315 **Acknowledgments**

316

317           The authors would like to thank the Wellcome Trust, the Brazilian National Research  
318 Council (CNPq), and the Coordination for the Improvement of Higher Education Personnel  
319 (CAPES) for providing financial support to this study. da Silva SG would like to thank you  
320 CAPES and CNPq (n. 439505/2016-0) for the scholarship and financial support.

321

## 322   **References**

- 323       1. Troiano RP, McClain JJ, Bychata RJ, Chen KY. Evolution of accelerometer methods  
324       for physical activity research. *Br J Sports Med* 2014; (13) 48:1019-23. doi:  
325       10.1136/bjsports-2014-093546.  
326
- 327       2. Ainsworth B, Cahalin L, Ross R. The Current State of Physical Activity Assessment  
328       Tools. *Prog Cardiovasc Dis* 2015; 57(4):387-95. doi: 10.1016/j.pcad.2014.10.005.  
329
- 330       3. Trost SG, McIver KL, Pate RR. Conducting accelerometer based activity assessments  
331       in Weld-based research. *Med Sci Sports Exerc* 2005; 37:S531–S543.  
332
- 333       4. Corder K, Brage S, Ekelund U. Accelerometers and pedometers: methodology and  
334       clinical application. *Curr Opin Clin Nutr Metab Care* 2007; 10:597–603.  
335
- 336       5. Warren JM, Ekelund U, Besson H, Mezzani A, Geladas N, Vanhees L, et al.  
337       Assessment of physical activity—a review of methodologies with reference to  
338       epidemiological research: a report of the exercise physiology section of the European  
339       Association of Cardiovascular Prevention and Rehabilitation. *Eur J Cardiovasc Prev  
340       Rehabil* 2010; 17:127–139.  
341
- 342       6. Pedisic Z, Bauman A. Accelerometer based measures in physical activity  
343       surveillance:current practices and issues. *Br J Sports Med* 2015; 49:219-23. doi:  
344       10.1136/bjsports-2013-093407.  
345
- 346       7. Reilly JJ, Penpraze V, Hislop J, Davies G, Grant S, Paton JY. Objective measurement  
347       of physical activity and sedentary behaviour: review with new data. *Arch Dis Child*  
348       2008;93:614-9. doi: 10.1136/adc.2007.133272.  
349
- 350       8. Cain KL, Sallis JF, Conway TL, Van Dyck D, Calhoun L Using accelerometers in  
351       youth physical activity studies: a review of methods. *J Phys Act Health* 2013;10:437-  
352       50.  
353
- 354       9. Byun W, Beets MW, Pate RR. Sedentary Behavior in Preschoolers: How Many Days  
355       of Accelerometer Monitoring Is Needed? *Int J Enviromen Res Public Health*  
356       2015;12(10):131-61. doi: 10.3390/ijerph121013148.  
357
- 358       10. Wolff-Hughes DL, McClain JJ, Dodd KW, Berrigan D, Troiano RP. Number of  
359       accelerometer monitoring days needed for stable group-level estimates of activity.  
360       *Physiol Meas* 2016; 37(9). doi: 10.1088/0967-3334/37/9/1447.  
361
- 362       11. Vanhelst J, Fardy PS, Duhamel A, Béghin L. How many days of accelerometer  
363       monitoring predict weekly physical activity behavior in obese youth? *Clin Physiol  
364       Funct Imaging* 2014; 34:384-8.  
365
- 366       12. Dillon CB, Fitzgerald AP, Kearney PM, Perry IJ, Rennie KL, Kozarski R et al.  
367       Number of Days Required to Estimate Habitual Activity Using Wrist-Worn

- 368 GENEActiv Accelerometer: A Cross-Sectional Study. *PloS One*  
369 2016;11(5):e0109913. doi: 10.1371/journal.pone.0109913.  
370  
371
- 372 13. Hart TL, Swartz AM, Cashin SE, Strath SJ. How many days of monitoring predict  
373 physical activity and sedentary behaviour in older adults? *Int J Behav Nutr Phys Act*  
374 2011; 16:8-62. doi: 10.1186/1479-5868-8-62.  
375
- 376 14. Silva SG, Evenson KR, Ricardo LI, Hallal PC. Leisure-time physical activity in  
377 pregnancy and maternal-child health: A systematic review and meta-analysis of  
378 randomized controlled trials and cohort studies. *Sports Med* 2017; 47(2):295-317. doi:  
379 10.1007/s40279-016-0565-2.  
380
- 381 15. Evenson K, Wen F. National prevalence and correlates of objectively measured  
382 physical activity and sedentary behaviors among pregnant women. *Prev Med* 2011;  
383 53:39-43. doi: 10.1016/j.ypmed.2011.04.014  
384
- 385 16. Hjorth MF, Kloster S, Girma T, Faurholt-Jepsen D, Andersen G, Kaestel P et al.  
386 Level and intensity of objectively assessed physical activity among pregnant women  
387 from urban Ethiopia. *BMC Pregnancy Childbirth* 2012; 17:12:154. doi:  
388 10.1186/1471-2393-12-154.  
389
- 390 17. Hallal, PC, Bertoldi, AD, Domingues, MR, Silveira, MF, Demarco, FF, da Silva ICM  
391 et al. Cohort Profile: The 2015 Pelotas (Brazil) Birth Cohort Study. *Int J Epidemiol*.  
392 2018 Aug 1;47(4):1048-1048h. doi: 10.1093/ije/dyx219  
393
- 394 18. Engineering/Marketing A. Actilife users manual. Pensacola, FL: ActiGraph; 2009.  
395
- 396 19. Van Hees VT, Gorzelniak L, Dean León EC, Eder M, Pias M, Taherian S et al.  
397 Separating Movement and Gravity Components in an Acceleration Signal and  
398 Implications for the Assessment of Human Daily Physical Activity. *PLoS ONE* 2013;  
399 8:4. doi: 10.1371/journal.pone.0061691.  
400
- 401 20. Silva IC, van Hees VT, Ramires VV, Knuth AG, Bielemann RM, Ekelund U, et al.  
402 Physical activity levels in three Brazilian birth cohorts as assessed with raw triaxial  
403 wrist accelerometry. *Int J Epidemiol* 2014;43(6):1959-68. doi: 10.1093/ije/dyu203.  
404
- 405 21. Hildebrand M, Van Hees V, Hansen BH, Ekelund U. Age-group comparability of raw  
406 accelerometer output from wrist- and- hip worn monitors. *Med Sci Sports Exerc*  
407 2014; 46:1816-24. doi: 10.1249/MSS.0000000000000289.  
408
- 409 22. Baranowski T, de Moor C. How many days was that? Intraindividual variability and  
410 physical activity assessment. *Res Q Exerc Sport* 2000; 71:S74-8.  
411
- 412 23. Barros AJD, Victora CG. A nationwide wealth score based on the 2000 Brazilian  
413 demographic census. *Rev Saude Publica* 2005; 39:523.  
414
- 415 24. World Health Organization. BMI Classification  
416 [http://apps.who.int/bmi/index.jsp?introPage=intro\\_3.html](http://apps.who.int/bmi/index.jsp?introPage=intro_3.html) Accessed 15 Feb 2018.

417  
418  
419  
420  
421  
422  
423  
424  
425  
426  
427  
428  
429  
430  
431  
432  
433  
434  
435  
436  
437  
438  
439  
440  
441  
442  
443  
444  
445  
446  
447  
448  
449  
450

25. Matthews CE, Ainsworth BE, Thompson RW, Bassett DR Jr. Sources of variance in daily physical activity levels as measured by an accelerometer. *Med Sci Sports Exerc* 2002; 34(8):1376–81.
26. Poudevigne MS, O'Connor PJ. A review of physical activity patterns in pregnant women and their relationship to psychological health. *Sports Med* 2006; 36(1):19-38.
27. Migueles JH, Cadenas-Sanchez C, Ekelund U, Delisle Nyström C, Mora-Gonzales J. Accelerometer Data Collection and Processing Criteria to Assess Physical Activity and Other Outcomes: A Systematic Review and Practical Considerations. *Sports Med.* 2017 Sep;47(9):1821-1845. doi: 10.1007/s40279-017-0716-0.
28. Coll C, Domingues M, Santos I, Matijasevich A, Horta BL, Hallal PC. Changes in leisure-time physical activity from the pre-pregnancy to the postpartum period: 2004 Pelotas (Brazil) Birth Cohort Study. *J Phys Act Health* 2016; 13(4):361–5. doi: 10.1123/jpah.2015-0324.
29. Kang M, Bassett DR, Barreira TV, Tudor-Locke C, Ainsworth BE. Measurement effects of seasonal and monthly variability on pedometer-determined data. *J Phys Act Health* 2012; 9(3):336–43.
30. Martins RC, Reichert FF, Bielemann RM, Hallal, PC. One year Stability of Objectively Measured Physical Activity in Young Brazilian Adults. *J Phys Act Health* 2017 Mar; 14(3):208-212. doi: 10.1123/jpah.2015-0384.



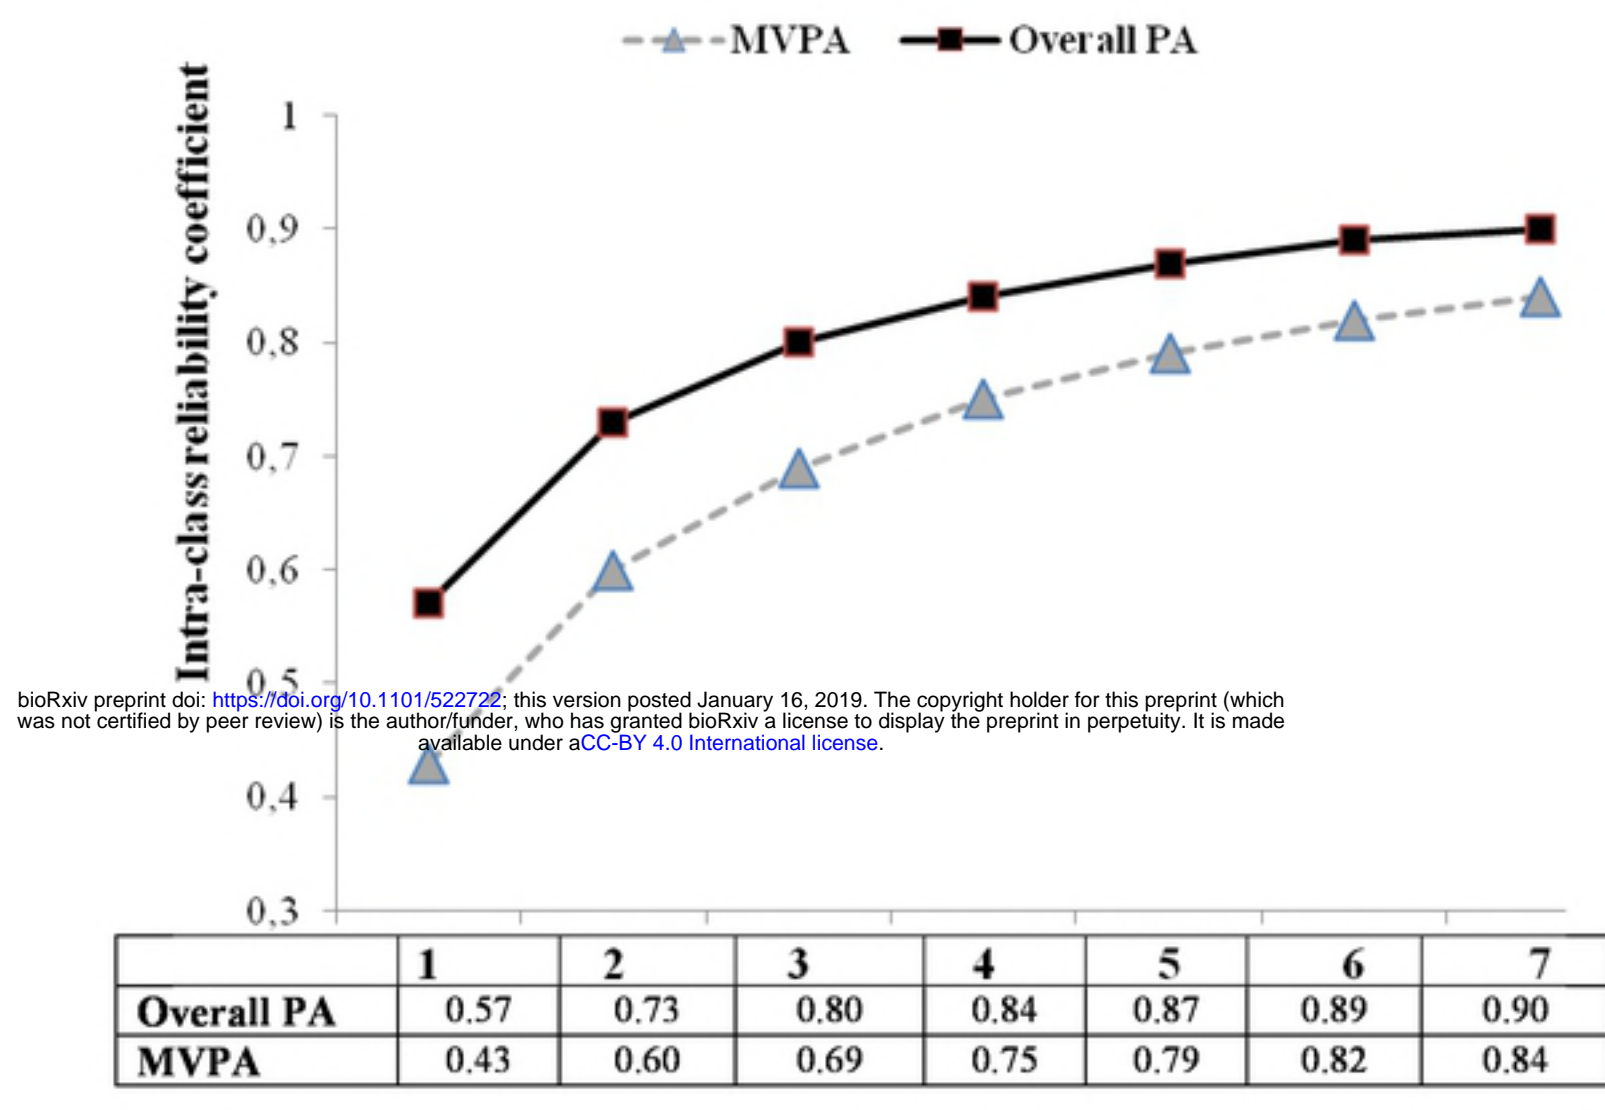

**Figure 1.** Reliability coefficient for number of days monitoring.

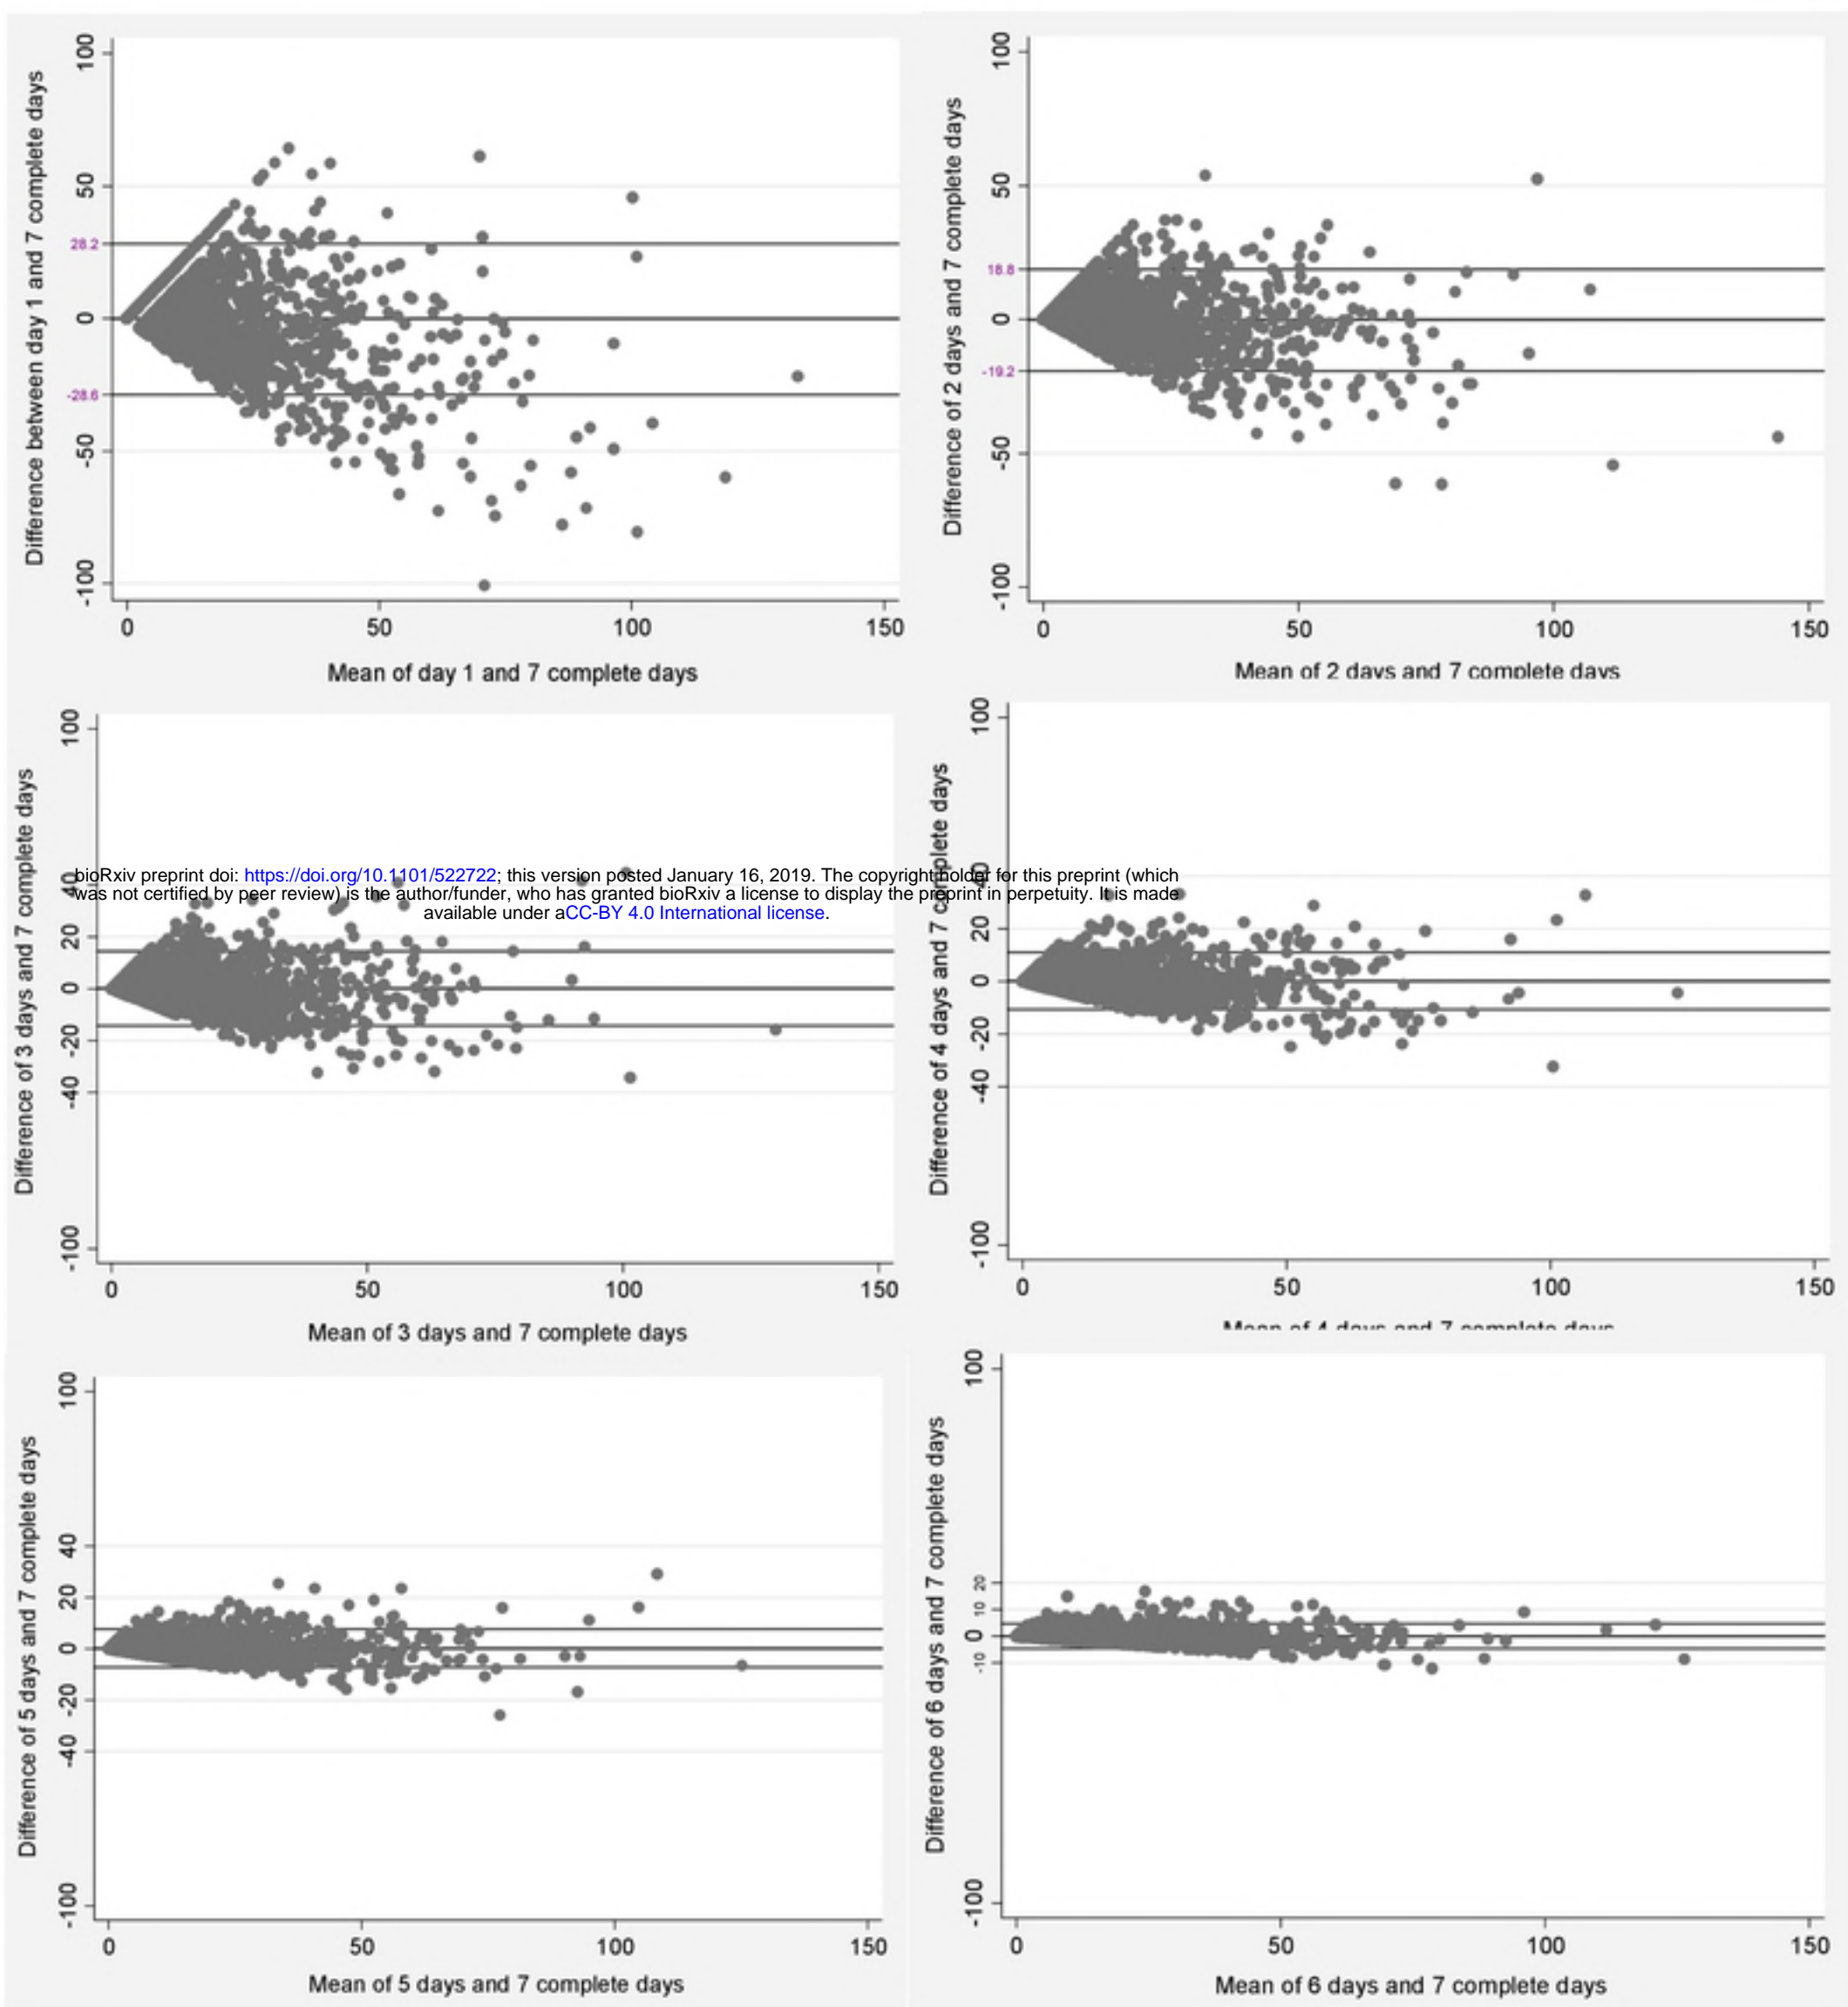

**Figure 2.** Bland-Altman plots of the comparison between the means of measurement days (1 to 6) and the standard of seven complete days of measurement for moderate-to-vigorous physical activity (MVPA).

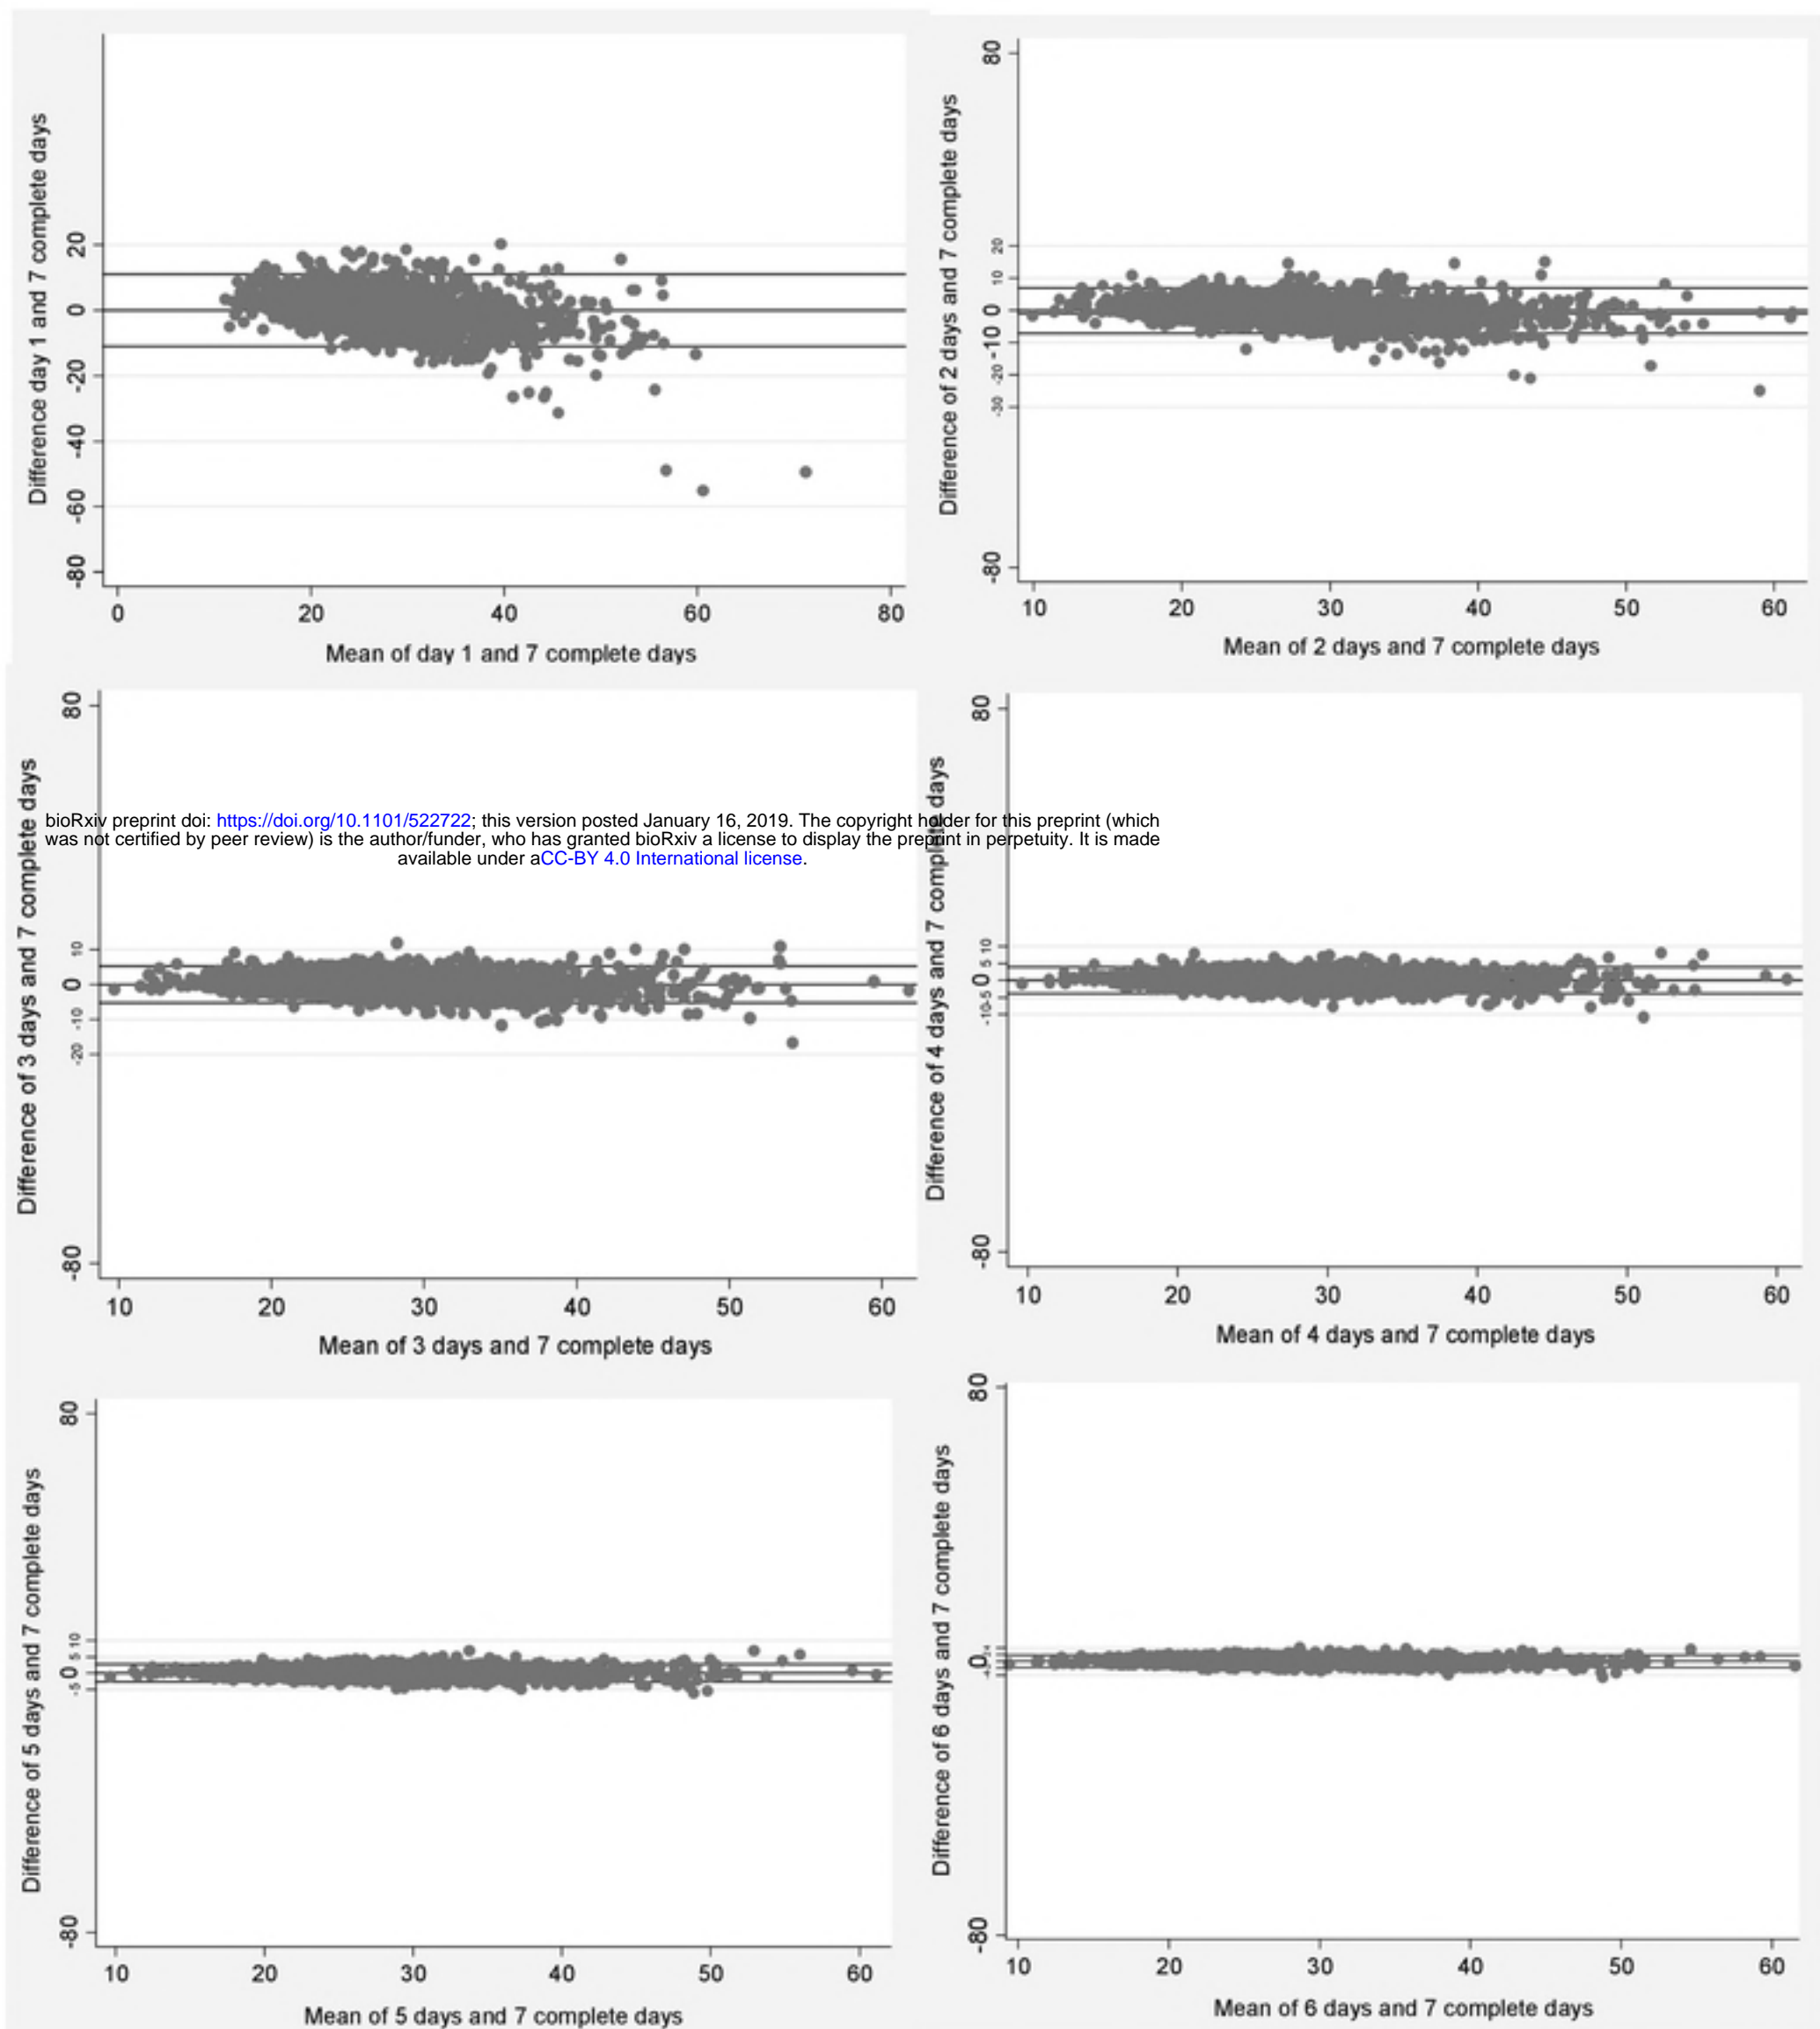

**Figure 3.** Bland-Altman plots of the comparison between the means of measurement days (1 to 6) and the standard of seven complete days of measurement for overall physical activity.
